# Supplementary material
Source: PubMed Central journal article supplement (PMC5715756)
Supplement: pnas.201710298SI.pdf [file pnas.201710298SI.pdf]

# Supporting Information

Koh et al. 10.1073/pnas.1710298114

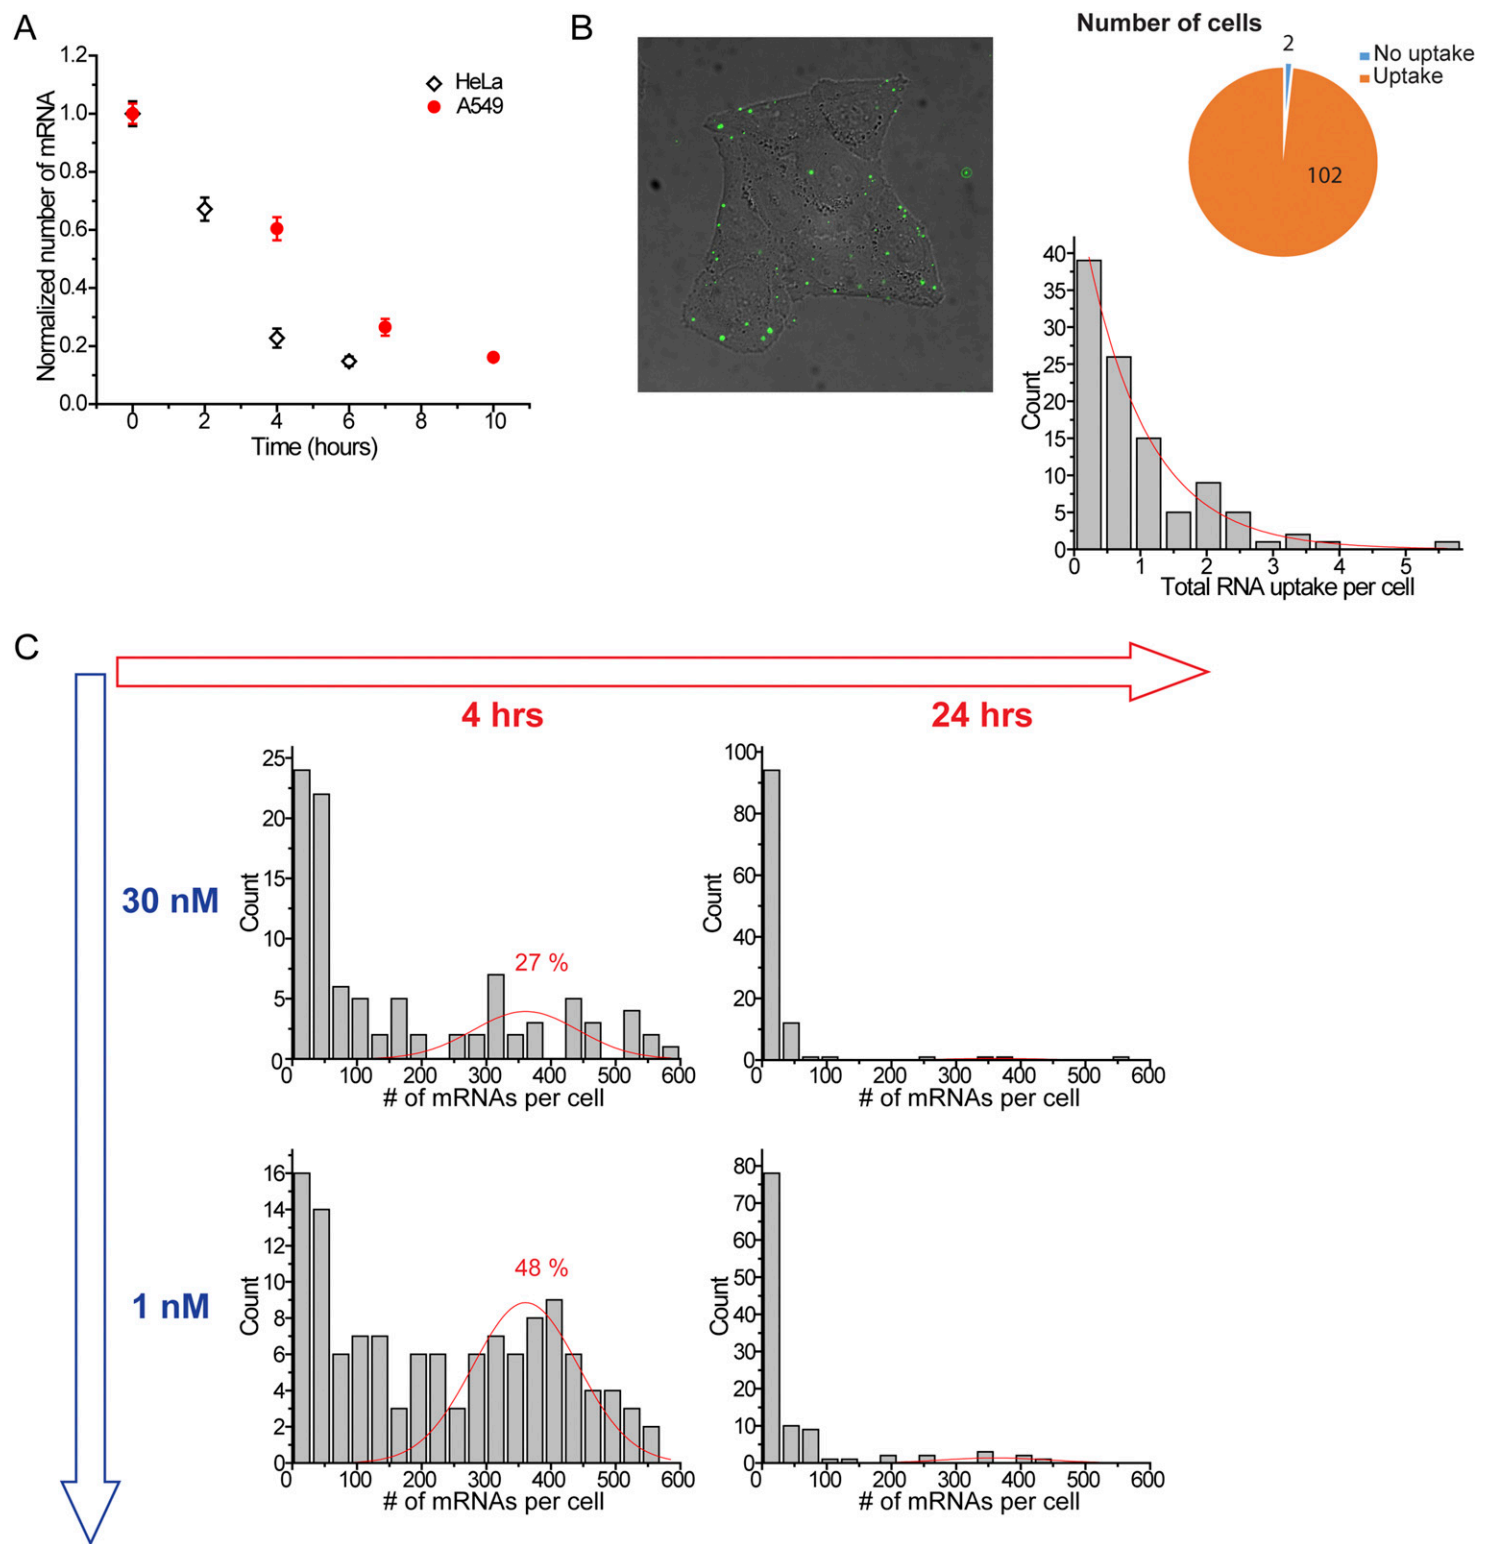

**Fig. S1.** (A) mRNA reduction in A549 cells vs. HeLa cells treated by 3 nM of U27 RNA continuously without washing shows the different silencing kinetics according to cell lines. (B) Cell images of labeled iRNA uptake show nearly 100% of transfection efficiency. (C) iRNA concentration-dependent gene silencing suggests that the unsilenced population seen at the early time point comes from the more slowly silencing population. We fit the unsilenced population to the Gaussian curve using the same mean and peak width of cytoplasmic mRNA as in a population of cells that were not treated with any iRNAs.





**A Cellular dicing reveals U27\_4M leads to faster dicing**

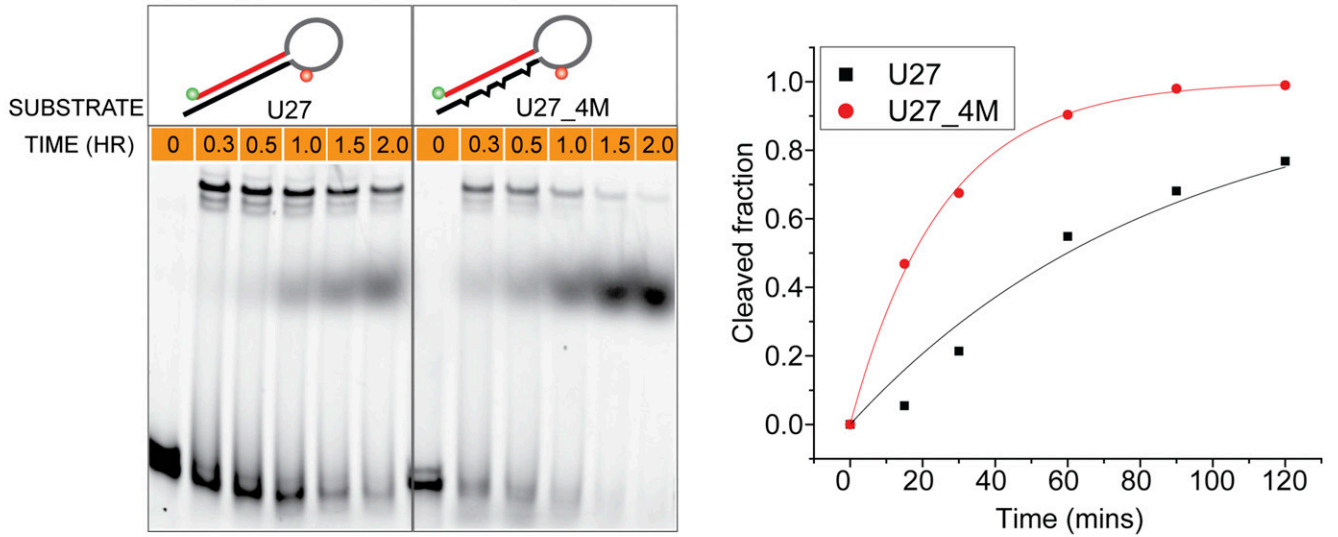

**B Differences in silencing NOT due to RNA uptake**

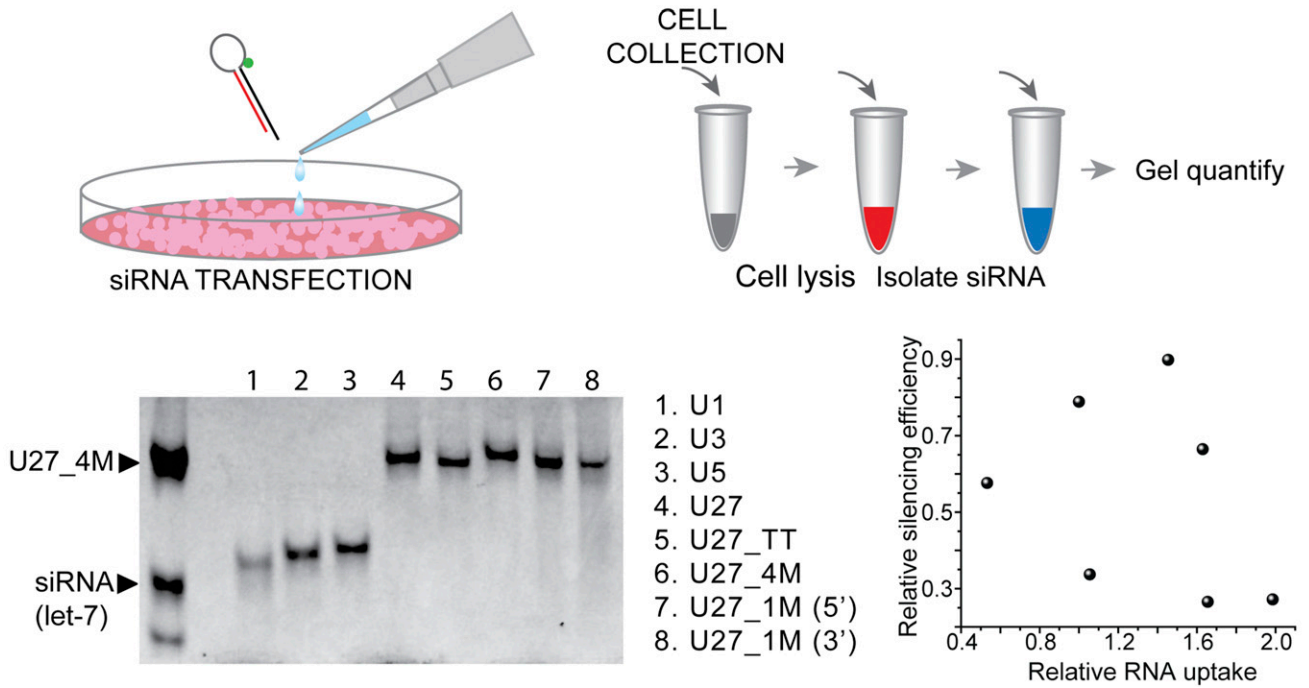

**Fig. 55.** Assays to measure the cellular dicing rate and the relative RNA uptake for iRNAs. (A) Cellular dicing assay using HeLa cell lysate confirms that the stem mismatches do not reduce the dicing rate. (B) The relative RNA uptake was measured for iRNAs by quantifying iRNAs extracted from cells that are transfected with labeled iRNAs. We found no correlation between the silencing efficiency and RNA uptake.



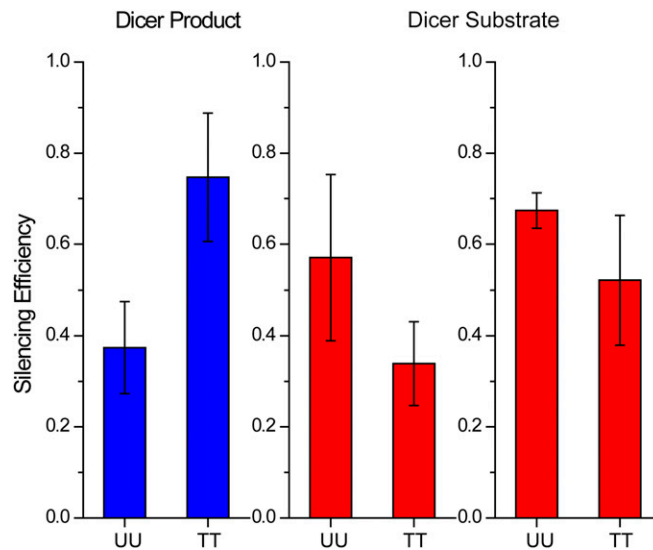

Fig. 57. DNA substitution at the 3' overhang of the Dicer product enhances the silencing efficiency, which is the opposite of the effect on the Dicer substrate. Two different Dicer substrates were tested, one with a loop (Center) and the other without a loop (Right).

Table S1. Sequences of FISH probes for lamin A gene

| Name    | Sequence              | Name           | Sequence              |
|---------|-----------------------|----------------|-----------------------|
| lmna_1  | tattgcagccctcagagttc  | lmna_intron_1  | aagagggacagacactgtag  |
| lmna_2  | ctgagcagctatcaggtcac  | lmna_intron_2  | ctgatgccagatatggaagc  |
| lmna_3  | cttctcactgagagcagtg   | lmna_intron_3  | ccatcactggcaaatctgat  |
| lmna_4  | ctagggtgcctcaagcttg   | lmna_intron_4  | ggaatcctctagtgtcac    |
| lmna_5  | atggtctgcagctgttctc   | lmna_intron_5  | ctagcagggaccaagtaga   |
| lmna_6  | ttctggaagtccagttcctc  | lmna_intron_6  | ccaagagatgactagggta   |
| lmna_7  | cagctcctcactgtagatgt  | lmna_intron_7  | ggtctccaaggaaagtaagg  |
| lmna_8  | caccagtccggtctcatgac  | lmna_intron_8  | ctgtaccactttggcacaag  |
| lmna_9  | gctgcttcccattgtcaatc  | lmna_intron_9  | gctgatgagcacagaagttt  |
| lmna_10 | cacctggctcctcatgctggg | lmna_intron_10 | catagatgcatgatccctgt  |
| lmna_11 | ggcagaataagtcttctcca  | lmna_intron_11 | tttcagaaggtgtctcaagg  |
| lmna_12 | gactgcctggcattgtccag  | lmna_intron_12 | ctaagccacaagttccagag  |
| lmna_13 | caggttgctgttccctcag   | lmna_intron_13 | ctctctaccctgaaggctaa  |
| lmna_14 | gactgctgcagctcctcgtg  | lmna_intron_14 | gcaacttagatcccgagctc  |
| lmna_15 | gctgccagctgcttctggag  | lmna_intron_15 | gctggtaaagtgaagcaact  |
| lmna_16 | aggtctcgaagcttcgcctc  | lmna_intron_16 | gaaccggagaatgtattccc  |
| lmna_17 | ctcacgggccagtgagtctc  | lmna_intron_17 | atagagtgcactcagaggg   |
| lmna_18 | gtttgcgctttttggtgacg  | lmna_intron_18 | agcaattcactgtgaagagg  |
| lmna_19 | ctgcggtctcagtggaactc  | lmna_intron_19 | gctgccatctgtaactcctc  |
| lmna_20 | ggtcctcattggacttgttg  | lmna_intron_20 | ctgggccctgattatTTTT   |
| lmna_21 | gatctgccaatgtgccatgg  | lmna_intron_21 | gctataaccagtcgaacagc  |
| lmna_22 | gatcatctccattctggcgc  | lmna_intron_22 | cctcaaagtgggtaagctt   |
| lmna_23 | gggaaccggtaagttagcaa  | lmna_intron_23 | atctggttccagatgtggat  |
| lmna_24 | gtgttctgtgccttccacac  | lmna_intron_24 | ctgatctgcactgaacagag  |
| lmna_25 | ttgatgagagccgtacgcag  | lmna_intron_25 | ggatgaccaggcacaatatt  |
| lmna_26 | ttgcgcattggccaacttctc | lmna_intron_26 | aagtctggttagagctcaga  |
| lmna_27 | aaccacagtcactgagcgca  | lmna_intron_27 | ttacacatgtgggactgtg   |
| lmna_28 | cgagcgcaggttgtactcag  | lmna_intron_28 | aaaggtactggtcactctc   |
| lmna_29 | cgctggcagatgccttgtcg  | lmna_intron_29 | tagcacttctcgatctgagc  |
| lmna_30 | cgagtgaaccgtgacactgga | lmna_intron_30 | ttacttagccttctccctgg  |
| lmna_31 | tgtatgatgctgcagttctg  | lmna_intron_31 | ttaggttggtttgcactctgc |
| lmna_32 | ggaaggcagctcaaacctcac | lmna_intron_32 | gctatgctgcattaccag    |
